# Supplementary material for: Identification of Epidemiological Traits by Analysis of SARS−CoV−2 Sequences
Source: MDPI journal article supplement (doi:10.3390/v13050764), 2021-04-27
Supplement: s1 [file s1]

# Supplementary Material:

## Identification of epidemiological traits by analysis of SARS-CoV-2 sequences

Bohu Pan<sup>†</sup>, Zuowei Ji<sup>†</sup>, Suguna Sakkiiah, Wenjing Guo, Jie Liu, Tucker A. Patterson, Huixiao Hong\*

National Center for Toxicological Research, U.S. Food and Drug Administration, 3900 NCTR Road, Jefferson, AR 72079, USA

<sup>†</sup> These authors made equal contributions

\*Correspondence should be addressed to Dr. Huixiao Hong: [huixiao.hong@fda.hhs.gov](mailto:huixiao.hong@fda.hhs.gov)

## **Table of content:**

Supplementary Figure S1. Sequence length distribution of GISAID set. **p3**

Supplementary Figure S2. Sequence length distribution of GeneBank set. **p4**

Supplementary Figure S3. Hierarchical clustering of sequence frequency distribution in countries. **p5**

Supplementary Figure S4. Hierarchical clustering of sequence frequency distribution in host age groups of GISAID dataset. **p6**

Supplementary Figure S5. Hierarchical clustering of sequence frequency distribution in host genders of GISAID dataset. **p7**

Supplementary Table S1. Summary of meta information of GeneBank and GISAID datasets. **p8**

Supplementary Table S2. Country names and their three-letter codes. **p9-10**

Supplementary Table S3. Sequence distribution in the major clades of GeneBank dataset by countries/regions. **p11**

Supplementary Table S4. Sequence distribution in the major clades of GISAID dataset by countries/regions. **p12**

Supplementary Table S5. Association between clades and PANGO lineages. **p13**

Supplementary Table S6. Sequence distribution in the major clades of GeneBank dataset by collection date groups. **p14**

Supplementary Table S7. Sequence distribution in the major clades of GISAID dataset by collection date groups. **p15**

Supplementary Table S8. Sequence distribution in the major clades of GISAID dataset by host age groups. **p16**

Supplementary Table S9. Sequence distribution in the major clades of GISAID dataset by host genders. **p17**

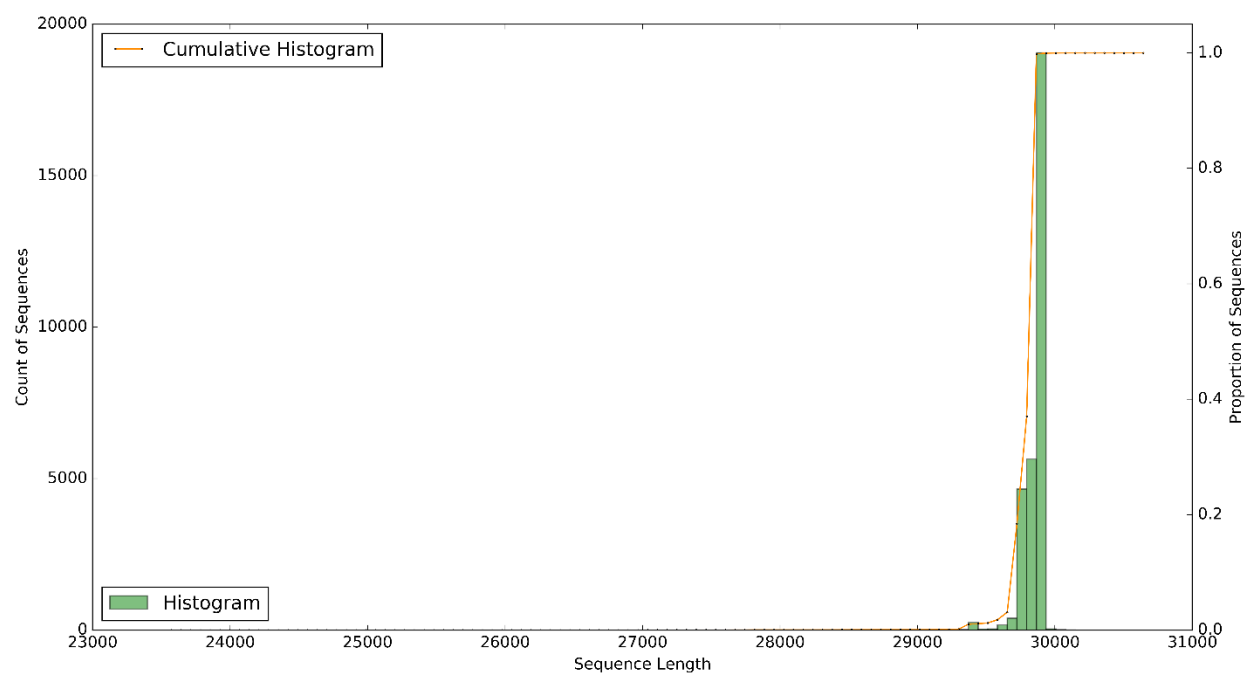

Supplementary Figure S1. Sequence length distribution of GISAID set. The x axis depicts the sequence length of each sequenced genomes. The left y axis depicts the count of corresponding sequences for each sequence. The right y axis depicts the cumulative proportion of the corresponding sequences.

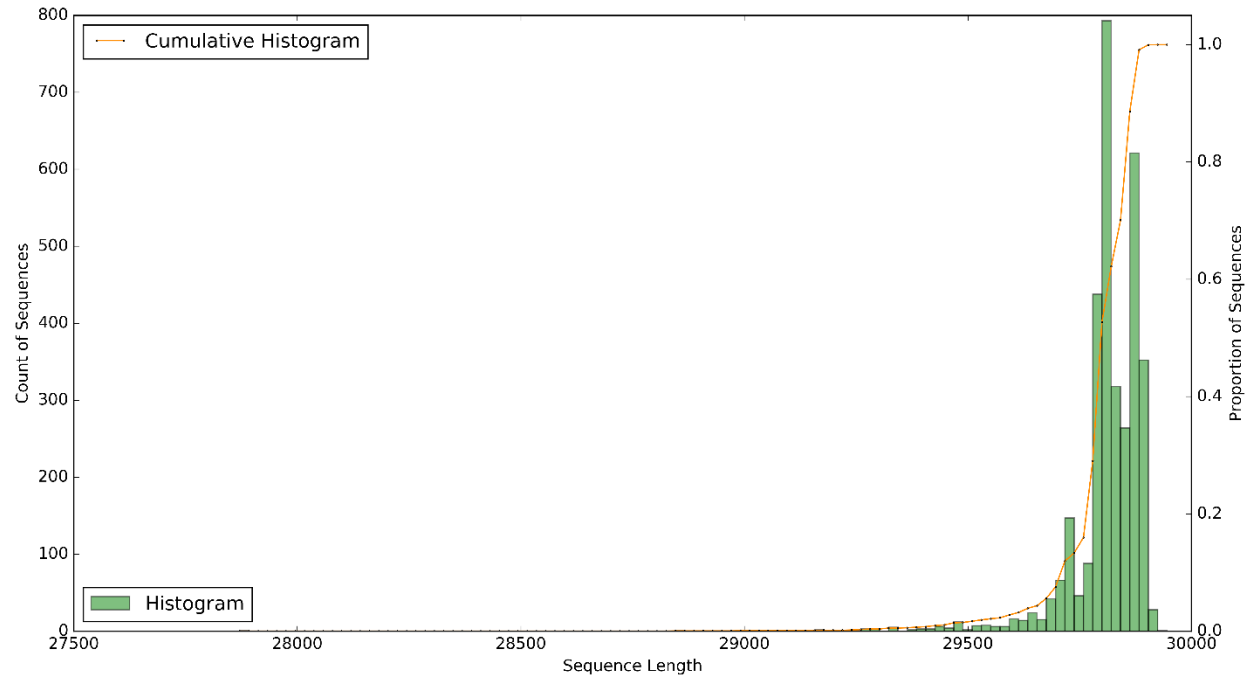

Supplementary Figure S2. Sequence length distribution of GeneBank set. The x axis depicts the sequence length of each sequenced genomes. The left y axis depicts the count of corresponding sequences for each sequence. The right y axis depicts the cumulative proportion of the corresponding sequences.

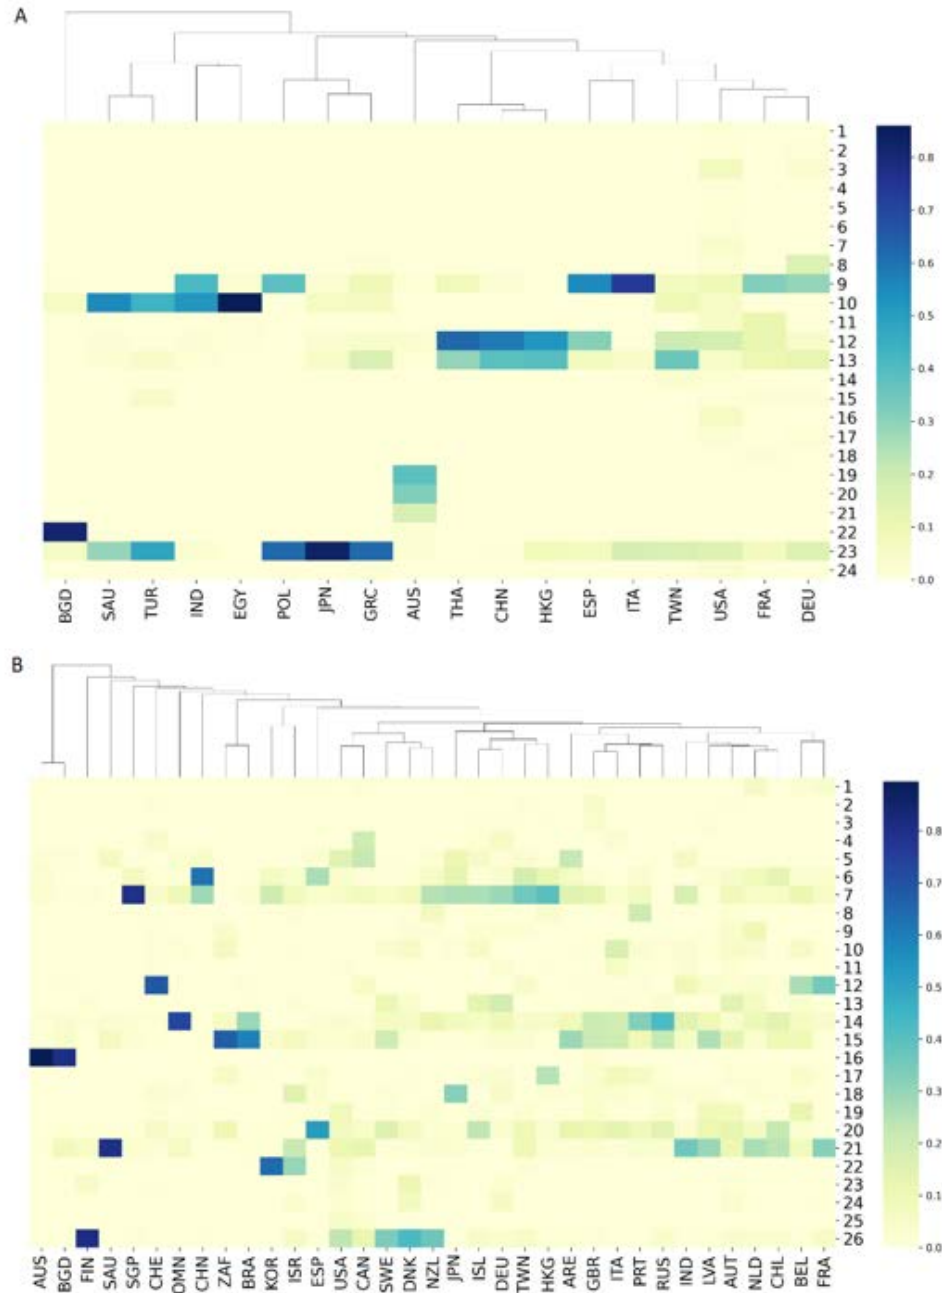

Supplementary Figure S3. Hierarchical clustering of sequence frequency distribution in countries/regions using (a) the GeneBank dataset, and (b) the GISAID dataset. Each column represents a country which is labeled with a three-letter country code. Each row depicts a major clade marked by its clade number. The color palette indicates the sample frequency.

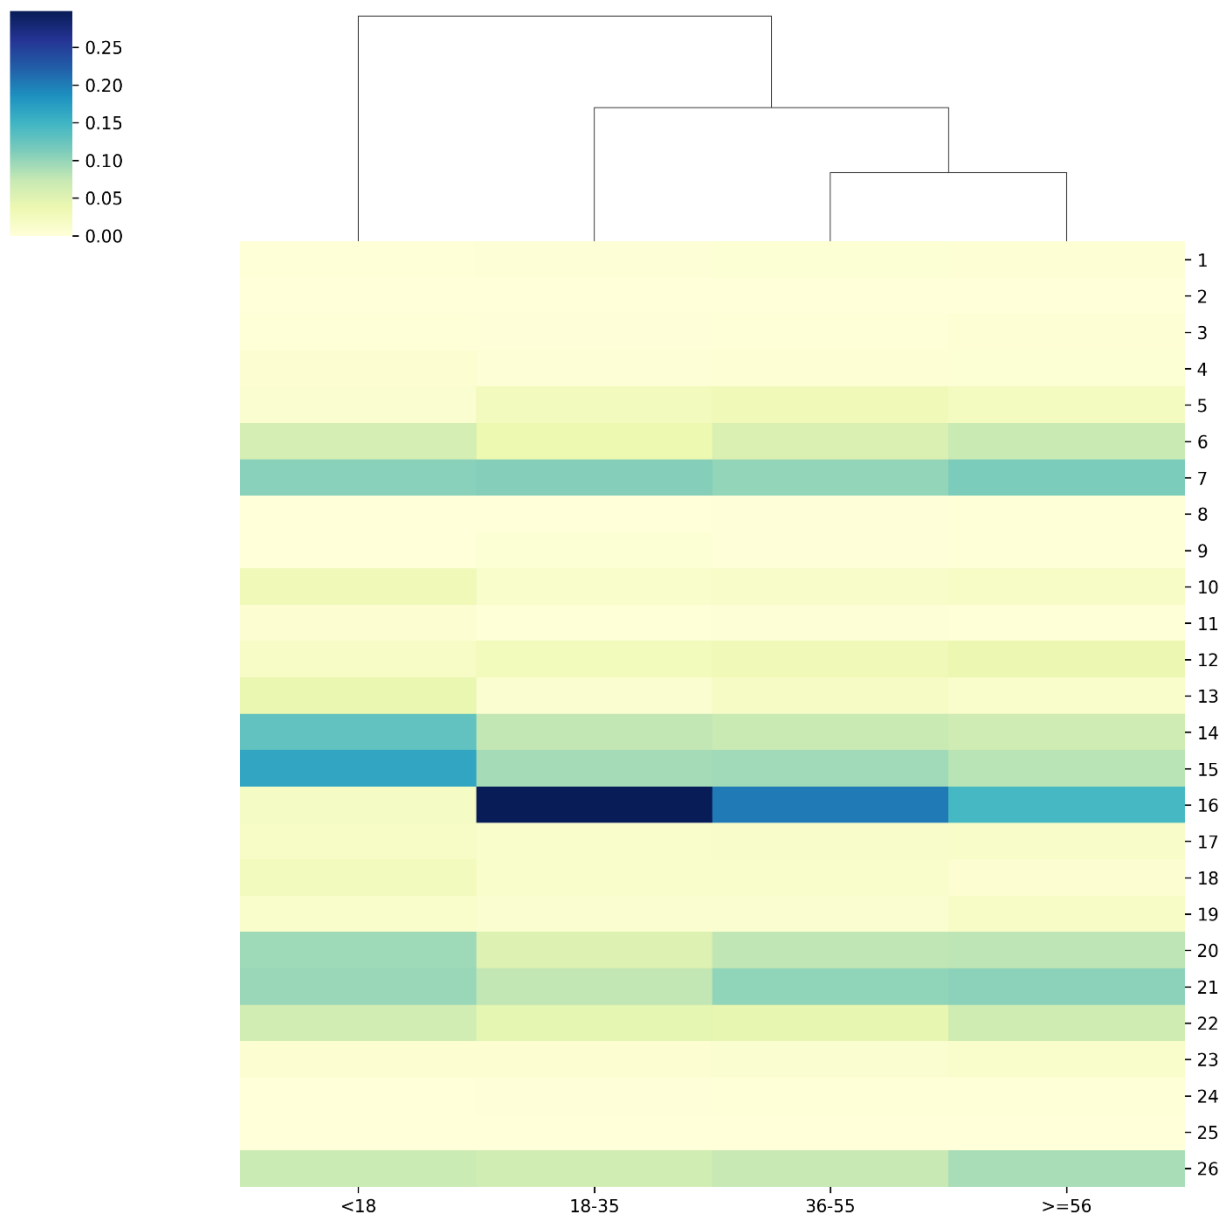

Supplementary Figure S4. Hierarchical clustering of sequence frequency distribution in host age groups of GISAID dataset. Each column represents an age group shown as an x-axis tick label. Each row depicts a major clade marked by its clade number. The color palette indicates the sample frequency.

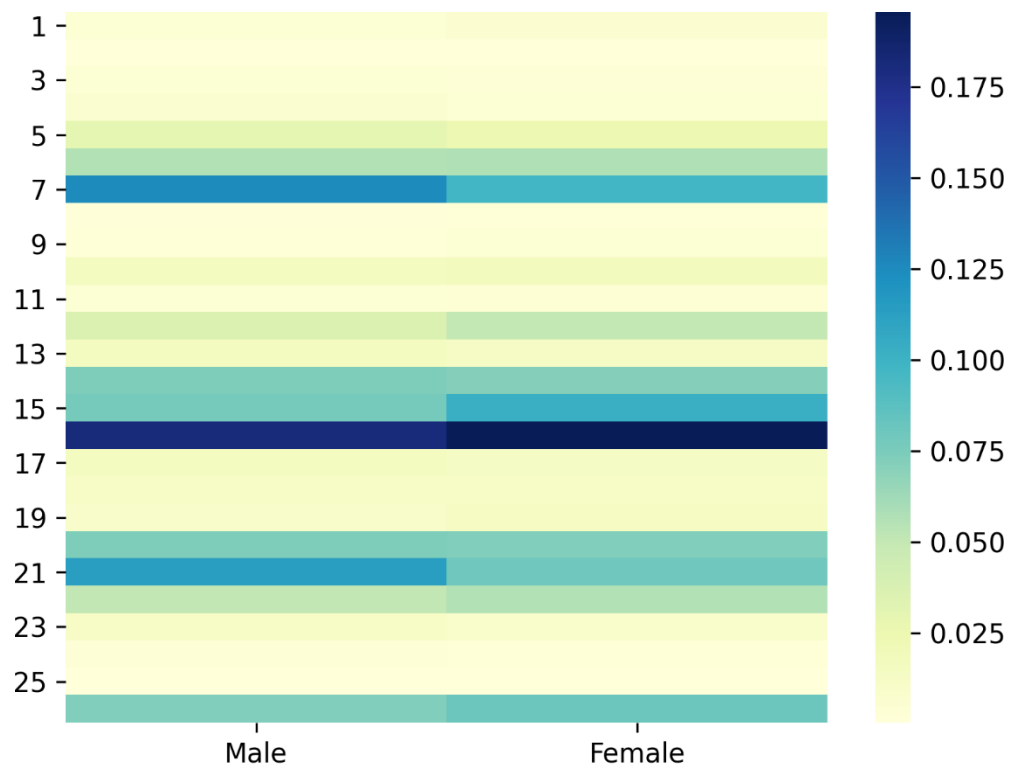

Supplementary Figure S5. Hierarchical clustering of sequence frequency distribution in host Genders of GISAID dataset. Each column represents a gender type shown as an x-axis tick label. Each row depicts a major clade marked by its clade number. The color palette indicates the sample frequency.

Supplementary Table S1. Summary of meta information of GeneBank and GISAID datasets.

| <b>Data Set</b>           |                     | <b>GeneBank</b> | <b>GISAID</b> |
|---------------------------|---------------------|-----------------|---------------|
| <b>Sequence Number</b>    |                     | 23735           | 99518         |
| <b>Selected Sequences</b> |                     | 12918           | 42043         |
| <b>Selected Sequences</b> | <b>With Country</b> | 12356           | 40673         |
|                           | <b>With Date</b>    | 12286           | 40673         |
|                           | <b>With Age</b>     | NA              | 16047         |
|                           | <b>With Gender</b>  | NA              | 16530         |



Supplementary Table S2. Country names and their three-letter codes.

| <b>Country Name</b> | <b>3 letter code</b> |
|---------------------|----------------------|
| Australia           | AUS                  |
| Austria             | AUT                  |
| Bangladesh          | BGD                  |
| Belgium             | BEL                  |
| Brazil              | BRA                  |
| Canada              | CAN                  |
| Chile               | CHL                  |
| China               | CHN                  |
| Denmark             | DNK                  |
| Egypt               | EGY                  |
| Finland             | FIN                  |
| France              | FRA                  |
| Germany             | DEU                  |
| Greece              | GRC                  |
| Hong Kong           | HKG                  |
| Iceland             | ISL                  |
| India               | IND                  |
| Israel              | ISR                  |
| Italy               | ITA                  |
| Japan               | JPN                  |
| Latvia              | LVA                  |
| Netherlands         | NLD                  |
| New Zealand         | NZL                  |
| Oman                | OMN                  |
| Portugal            | PRT                  |

|                      |     |
|----------------------|-----|
| Russia               | RUS |
| Saudi Arabia         | SAU |
| Singapore            | SGP |
| South Africa         | ZAF |
| South Korea          | KOR |
| Spain                | ESP |
| Sweden               | SWE |
| Switzerland          | CHE |
| Taiwan               | TWN |
| Thailand             | THA |
| Turkey               | TUR |
| United Arab Emirates | ARE |
| United Kingdom       | GBR |
| USA                  | USA |

Supplementary Table 3. Sequence distribution in the major clades of GeneBank dataset by countries/regions\*

| Clade Id | Sequences | Africa |     | Asia |     |     |     |     |     |     |     | Europe |     |     |     |     | North America |      | Oceania |
|----------|-----------|--------|-----|------|-----|-----|-----|-----|-----|-----|-----|--------|-----|-----|-----|-----|---------------|------|---------|
|          |           | EGY    | SAU | IND  | BGD | CHN | HKG | TWN | JPN | THA | FRA | GRC    | DEU | ESP | ITA | TUR | USA           | AUS  |         |
| 1        | 75        | 0      | 0   | 0    | 0   | 0   | 0   | 0   | 0   | 0   | 0   | 0      | 0   | 0   | 0   | 0   | 75            | 0    |         |
| 2        | 57        | 0      | 0   | 0    | 0   | 0   | 0   | 0   | 0   | 0   | 0   | 0      | 0   | 1   | 0   | 0   | 54            | 2    |         |
| 3        | 511       | 0      | 0   | 0    | 0   | 0   | 0   | 0   | 0   | 0   | 0   | 0      | 0   | 2   | 0   | 0   | 497           | 4    |         |
| 4        | 86        | 0      | 0   | 0    | 0   | 0   | 0   | 0   | 0   | 0   | 0   | 0      | 0   | 0   | 0   | 0   | 86            | 0    |         |
| 5        | 61        | 0      | 0   | 0    | 0   | 0   | 0   | 0   | 0   | 0   | 0   | 0      | 0   | 0   | 0   | 0   | 61            | 0    |         |
| 6        | 71        | 0      | 0   | 0    | 0   | 0   | 0   | 0   | 0   | 0   | 0   | 0      | 0   | 0   | 0   | 0   | 71            | 0    |         |
| 7        | 246       | 0      | 0   | 0    | 0   | 0   | 0   | 0   | 0   | 0   | 0   | 0      | 0   | 0   | 0   | 0   | 240           | 2    |         |
| 8        | 175       | 0      | 0   | 0    | 0   | 0   | 0   | 0   | 0   | 0   | 0   | 1      | 10  | 0   | 0   | 0   | 124           | 10   |         |
| 9        | 1144      | 5      | 0   | 201  | 2   | 2   | 2   | 0   | 2   | 0   | 27  | 7      | 19  | 2   | 0   | 17  | 627           | 50   |         |
| 10       | 907       | 160    | 0   | 252  | 13  | 0   | 0   | 31  | 5   | 0   | 0   | 5      | 0   | 3   | 10  | 0   | 394           | 19   |         |
| 11       | 463       | 2      | 0   | 0    | 1   | 0   | 0   | 0   | 0   | 0   | 10  | 0      | 0   | 0   | 0   | 0   | 352           | 10   |         |
| 12       | 1465      | 2      | 0   | 9    | 1   | 61  | 15  | 1   | 2   | 0   | 10  | 3      | 3   | 6   | 0   | 0   | 1207          | 102  |         |
| 13       | 733       | 0      | 65  | 8    | 1   | 40  | 7   | 1   | 4   | 0   | 9   | 13     | 8   | 11  | 1   | 1   | 352           | 58   |         |
| 14       | 140       | 0      | 0   | 0    | 0   | 0   | 0   | 0   | 0   | 0   | 0   | 0      | 0   | 1   | 0   | 0   | 138           | 1    |         |
| 15       | 81        | 0      | 0   | 0    | 0   | 0   | 0   | 0   | 0   | 0   | 1   | 0      | 1   | 0   | 1   | 0   | 74            | 1    |         |
| 16       | 406       | 0      | 0   | 0    | 0   | 0   | 0   | 0   | 0   | 0   | 0   | 0      | 0   | 0   | 0   | 0   | 400           | 6    |         |
| 17       | 170       | 0      | 0   | 1    | 0   | 0   | 0   | 0   | 0   | 0   | 0   | 0      | 1   | 0   | 0   | 0   | 140           | 21   |         |
| 18       | 68        | 0      | 0   | 0    | 0   | 0   | 0   | 0   | 0   | 0   | 1   | 0      | 0   | 0   | 0   | 0   | 59            | 1    |         |
| 19       | 1342      | 0      | 0   | 0    | 0   | 0   | 0   | 0   | 0   | 0   | 0   | 0      | 0   | 0   | 0   | 0   | 0             | 1342 |         |
| 20       | 1134      | 0      | 0   | 0    | 0   | 0   | 0   | 0   | 0   | 0   | 0   | 0      | 0   | 0   | 0   | 0   | 0             | 1134 |         |
| 21       | 582       | 0      | 0   | 0    | 0   | 0   | 0   | 0   | 0   | 0   | 0   | 0      | 0   | 0   | 0   | 0   | 0             | 582  |         |
| 22       | 256       | 0      | 0   | 0    | 186 | 0   | 0   | 0   | 0   | 0   | 0   | 0      | 0   | 0   | 0   | 0   | 0             | 70   |         |
| 23       | 1498      | 1      | 0   | 13   | 13  | 1   | 0   | 16  | 70  | 0   | 6   | 49     | 10  | 5   | 11  | 4   | 1057          | 76   |         |
| 24       | 216       | 0      | 0   | 0    | 0   | 0   | 0   | 0   | 0   | 0   | 0   | 1      | 0   | 0   | 0   | 0   | 208           | 3    |         |

\*See full name in supplementary table 2.

Supplementary Table 4. Sequence distribution in the major clades of GISAID dataset by countries/regions\*

| Clade<br>Id | Sequences | Africa |     | Asia |     |     |     |     |     |     |     |     |     |     |      | Europe |     |     |     |     |     |     |     |     |     |     |     | North<br>America |     |      |      | South<br>America |     | Oceania |      |     |   |
|-------------|-----------|--------|-----|------|-----|-----|-----|-----|-----|-----|-----|-----|-----|-----|------|--------|-----|-----|-----|-----|-----|-----|-----|-----|-----|-----|-----|------------------|-----|------|------|------------------|-----|---------|------|-----|---|
|             |           | ZAF    | SAU | ARE  | IND | BGD | CHN | HKG | TWN | JPN | KOR | SGP | ISR | OMN | GBR  | NLD    | PRT | BEL | ESP | SWE | FRA | DNK | RUS | ISL | CHE | ITA | FIN | DEU              | AUT | LVA  | USA  | CAN              | BRA | CHL     | AUS  | NZL |   |
| 1           | 211       | 0      | 0   | 0    | 0   | 0   | 0   | 0   | 0   | 0   | 0   | 0   | 1   | 0   | 24   | 93     | 5   | 14  | 7   | 0   | 15  | 0   | 0   | 3   | 0   | 1   | 0   | 0                | 0   | 0    | 0    | 15               | 12  | 0       | 0    | 0   | 0 |
| 2           | 395       | 0      | 0   | 0    | 0   | 0   | 0   | 0   | 1   | 0   | 0   | 0   | 0   | 0   | 381  | 0      | 0   | 0   | 0   | 0   | 1   | 0   | 2   | 4   | 0   | 0   | 0   | 0                | 0   | 1    | 0    | 0                | 0   | 0       | 0    | 0   | 0 |
| 3           | 353       | 0      | 0   | 0    | 1   | 0   | 0   | 1   | 0   | 1   | 3   | 0   | 0   | 0   | 277  | 0      | 2   | 0   | 0   | 0   | 1   | 1   | 0   | 3   | 0   | 0   | 0   | 1                | 0   | 2    | 37   | 3                | 0   | 0       | 0    | 0   | 0 |
| 4           | 261       | 0      | 0   | 0    | 0   | 0   | 0   | 0   | 0   | 0   | 0   | 1   | 0   | 0   | 39   | 15     | 0   | 4   | 0   | 0   | 2   | 1   | 2   | 4   | 10  | 4   | 0   | 5                | 0   | 0    | 25   | 123              | 2   | 0       | 1    | 0   |   |
| 5           | 1796      | 0      | 30  | 31   | 54  | 5   | 26  | 1   | 3   | 60  | 0   | 1   | 0   | 4   | 6    | 5      | 2   | 4   | 13  | 3   | 0   | 2   | 15  | 0   | 0   | 0   | 1   | 0                | 0   | 1302 | 138  | 0                | 1   | 37      | 2    | 0   |   |
| 6           | 1685      | 1      | 1   | 8    | 3   | 0   | 417 | 12  | 17  | 75  | 44  | 15  | 5   | 2   | 159  | 125    | 23  | 18  | 163 | 7   | 14  | 3   | 1   | 3   | 3   | 0   | 1   | 3                | 6   | 3    | 315  | 7                | 3   | 17      | 84   | 5   |   |
| 7           | 3289      | 0      | 2   | 21   | 160 | 1   | 191 | 40  | 33  | 151 | 136 | 166 | 12  | 16  | 1032 | 86     | 55  | 71  | 22  | 28  | 22  | 17  | 2   | 76  | 10  | 6   | 3   | 25               | 12  | 2    | 459  | 47               | 7   | 7       | 70   | 23  |   |
| 8           | 221       | 0      | 0   | 0    | 1   | 0   | 0   | 4   | 0   | 0   | 0   | 0   | 2   | 0   | 23   | 9      | 156 | 0   | 0   | 0   | 0   | 0   | 0   | 3   | 1   | 1   | 0   | 0                | 2   | 0    | 6    | 0                | 0   | 0       | 1    | 7   |   |
| 9           | 218       | 15     | 0   | 0    | 0   | 0   | 0   | 0   | 1   | 0   | 0   | 0   | 0   | 0   | 0    | 159    | 3   | 3   | 0   | 0   | 0   | 4   | 0   | 7   | 3   | 0   | 0   | 2                | 5   | 1    | 5    | 0                | 0   | 0       | 1    | 1   |   |
| 10          | 425       | 27     | 0   | 1    | 30  | 0   | 0   | 0   | 0   | 0   | 9   | 0   | 1   | 3   | 59   | 65     | 20  | 36  | 0   | 15  | 4   | 11  | 5   | 16  | 4   | 26  | 1   | 0                | 6   | 1    | 14   | 0                | 0   | 0       | 3    | 0   |   |
| 11          | 236       | 1      | 0   | 0    | 23  | 1   | 1   | 1   | 0   | 1   | 0   | 0   | 0   | 0   | 35   | 2      | 7   | 1   | 0   | 0   | 3   | 1   | 2   | 0   | 3   | 8   | 0   | 2                | 3   | 0    | 138  | 0                | 0   | 0       | 0    | 0   |   |
| 12          | 1007      | 1      | 0   | 1    | 85  | 2   | 2   | 0   | 4   | 3   | 1   | 0   | 0   | 1   | 65   | 53     | 13  | 168 | 0   | 0   | 141 | 1   | 1   | 0   | 163 | 1   | 1   | 0                | 3   | 5    | 13   | 33               | 5   | 3       | 3    | 0   |   |
| 13          | 393       | 0      | 0   | 0    | 0   | 0   | 0   | 0   | 1   | 0   | 1   | 1   | 2   | 0   | 71   | 97     | 3   | 21  | 0   | 54  | 2   | 8   | 8   | 39  | 1   | 3   | 3   | 16               | 20  | 0    | 8    | 1                | 3   | 0       | 3    | 0   |   |
| 14          | 3493      | 23     | 13  | 12   | 132 | 9   | 4   | 5   | 4   | 45  | 2   | 5   | 0   | 126 | 1608 | 162    | 255 | 40  | 12  | 29  | 18  | 13  | 132 | 16  | 4   | 29  | 4   | 8                | 5   | 12   | 305  | 15               | 93  | 18      | 50   | 11  |   |
| 15          | 3443      | 269    | 31  | 41   | 50  | 10  | 5   | 1   | 3   | 7   | 32  | 4   | 10  | 0   | 1642 | 49     | 75  | 59  | 17  | 100 | 4   | 4   | 70  | 5   | 2   | 30  | 0   | 3                | 19  | 33   | 208  | 25               | 189 | 13      | 18   | 1   | 0 |
| 16          | 3447      | 0      | 0   | 0    | 0   | 230 | 0   | 0   | 0   | 0   | 0   | 0   | 0   | 0   | 182  | 0      | 0   | 0   | 0   | 0   | 0   | 0   | 0   | 0   | 0   | 0   | 0   | 0                | 0   | 0    | 0    | 0                | 0   | 0       | 2984 | 0   |   |
| 17          | 560       | 22     | 2   | 0    | 1   | 0   | 0   | 0   | 0   | 0   | 2   | 3   | 0   | 1   | 252  | 17     | 48  | 26  | 20  | 0   | 4   | 2   | 6   | 6   | 0   | 13  | 0   | 3                | 3   | 0    | 30   | 1                | 4   | 2       | 5    | 0   |   |
| 18          | 781       | 0      | 0   | 2    | 18  | 0   | 0   | 0   | 0   | 0   | 0   | 0   | 0   | 2   | 259  | 33     | 6   | 9   | 18  | 6   | 3   | 1   | 8   | 1   | 6   | 4   | 1   | 4                | 0   | 3    | 60   | 6                | 3   | 2       | 4    | 0   |   |
| 19          | 1366      | 1      | 0   | 1    | 0   | 0   | 0   | 0   | 0   | 0   | 0   | 0   | 0   | 0   | 318  | 12     | 1   | 75  | 7   | 7   | 4   | 0   | 8   | 6   | 3   | 1   | 0   | 0                | 11  | 11   | 795  | 0                | 0   | 0       | 2    | 2   |   |
| 20          | 2844      | 41     | 4   | 17   | 27  | 4   | 7   | 3   | 9   | 12  | 5   | 2   | 1   | 4   | 805  | 106    | 69  | 17  | 319 | 81  | 2   | 15  | 44  | 67  | 14  | 20  | 2   | 3                | 18  | 14   | 655  | 29               | 3   | 29      | 16   | 2   |   |
| 21          | 3084      | 0      | 342 | 2    | 337 | 23  | 1   | 2   | 9   | 15  | 6   | 5   | 31  | 11  | 249  | 414    | 29  | 49  | 4   | 7   | 129 | 3   | 8   | 1   | 3   | 2   | 10  | 0                | 15  | 37   | 928  | 74               | 3   | 31      | 26   | 3   |   |
| 22          | 959       | 0      | 0   | 0    | 0   | 0   | 1   | 0   | 1   | 0   | 0   | 0   | 0   | 0   | 5    | 0      | 0   | 0   | 0   | 0   | 0   | 0   | 0   | 0   | 0   | 0   | 0   | 0                | 0   | 0    | 455  | 7                | 2   | 0       | 2    | 0   |   |
| 23          | 408       | 0      | 0   | 0    | 1   | 0   | 0   | 0   | 0   | 0   | 0   | 0   | 0   | 0   | 12   | 0      | 5   | 1   | 0   | 0   | 4   | 23  | 1   | 1   | 2   | 0   | 9   | 2                | 2   | 0    | 311  | 3                | 2   | 1       | 3    | 1   |   |
| 24          | 292       | 0      | 0   | 0    | 0   | 0   | 0   | 0   | 0   | 0   | 0   | 1   | 4   | 0   | 37   | 11     | 2   | 3   | 0   | 0   | 3   | 16  | 0   | 0   | 1   | 0   | 1   | 5                | 4   | 0    | 193  | 6                | 0   | 0       | 1    | 0   |   |
| 25          | 462       | 0      | 0   | 0    | 0   | 0   | 0   | 0   | 0   | 0   | 0   | 0   | 0   | 0   | 0    | 0      | 0   | 0   | 0   | 0   | 0   | 0   | 0   | 0   | 0   | 0   | 0   | 0                | 0   | 0    | 445  | 17               | 0   | 0       | 0    | 0   |   |
| 26          | 3003      | 2      | 1   | 3    | 5   | 0   | 5   | 2   | 5   | 3   | 4   | 3   | 8   | 1   | 100  | 38     | 2   | 6   | 5   | 174 | 22  | 94  | 11  | 14  | 0   | 0   | 156 | 3                | 5   | 2    | 2073 | 75               | 0   | 4       | 23   | 34  |   |

\*See full name in supplementary table 2.

Supplementary Table S5. Association between clades and PANGO lineages.

| Clade Id | Sequences | PANGO lineage |               |
|----------|-----------|---------------|---------------|
|          |           | Name          | Frequency (%) |
| 1        | 211       | B.1           | 78.20         |
| 2        | 395       | B.1.93        | 91.65         |
| 3        | 353       | B.1           | 51.27         |
| 4        | 261       | B.1           | 96.17         |
| 5        | 1796      | A.1           | 79.06         |
| 6        | 1685      | B             | 36.26         |
| 7        | 3289      | B.2           | 22.29         |
| 8        | 221       | B.1           | 57.47         |
| 9        | 218       | B.1.8         | 96.33         |
| 10       | 425       | B.1           | 83.53         |
| 11       | 236       | B.1           | 93.22         |
| 12       | 1007      | B.1           | 75.67         |
| 13       | 393       | B.1.1         | 92.88         |
| 14       | 3493      | B.1.1         | 77.64         |
| 15       | 3443      | B.1.1         | 54.28         |
| 16       | 3447      | B.1.1.25      | 96.08         |
| 17       | 560       | B.1.1         | 91.43         |
| 18       | 781       | B.1.1         | 91.68         |
| 19       | 1366      | B.1.1         | 87.48         |
| 20       | 2844      | B.1           | 44.30         |
| 21       | 3084      | B.1           | 42.67         |
| 22       | 959       | B.1           | 64.13         |
| 23       | 408       | B.1           | 90.69         |
| 24       | 292       | B.1           | 88.36         |
| 25       | 462       | B.1.21        | 93.94         |
| 26       | 3003      | B.1           | 53.45         |

Supplementary Table S6. Sequence distribution in the major clades of GeneBank dataset by collection date groups

| Major Clade Id | Sequences | Jan & Before | Feb | Mar | Apr | May | Jun | Jul  | Aug |
|----------------|-----------|--------------|-----|-----|-----|-----|-----|------|-----|
| 1              | 75        | 0            | 0   | 0   | 74  | 1   | 0   | 0    | 0   |
| 2              | 57        | 0            | 0   | 17  | 26  | 8   | 2   | 2    | 2   |
| 3              | 511       | 1            | 0   | 172 | 181 | 114 | 32  | 7    | 2   |
| 4              | 86        | 0            | 0   | 13  | 19  | 17  | 15  | 11   | 11  |
| 5              | 61        | 0            | 0   | 0   | 1   | 1   | 0   | 59   | 0   |
| 6              | 71        | 0            | 0   | 33  | 38  | 0   | 0   | 0    | 0   |
| 7              | 246       | 0            | 0   | 67  | 70  | 19  | 35  | 49   | 6   |
| 8              | 175       | 1            | 0   | 83  | 49  | 8   | 5   | 1    | 0   |
| 9              | 1144      | 8            | 11  | 294 | 187 | 129 | 260 | 93   | 45  |
| 10             | 907       | 2            | 16  | 136 | 179 | 158 | 198 | 63   | 149 |
| 11             | 463       | 0            | 0   | 182 | 137 | 16  | 14  | 12   | 21  |
| 12             | 1465      | 99           | 70  | 823 | 321 | 83  | 56  | 3    | 0   |
| 13             | 733       | 55           | 125 | 275 | 150 | 24  | 5   | 1    | 0   |
| 14             | 140       | 0            | 0   | 66  | 42  | 27  | 4   | 1    | 0   |
| 15             | 81        | 0            | 0   | 50  | 19  | 7   | 2   | 0    | 0   |
| 16             | 406       | 0            | 0   | 89  | 97  | 70  | 87  | 35   | 28  |
| 17             | 170       | 1            | 0   | 109 | 48  | 4   | 0   | 2    | 0   |
| 18             | 68        | 0            | 0   | 28  | 20  | 11  | 4   | 1    | 0   |
| 19             | 1342      | 55           | 0   | 0   | 0   | 0   | 99  | 1188 | 0   |
| 20             | 1134      | 37           | 0   | 1   | 0   | 5   | 143 | 948  | 0   |
| 21             | 582       | 13           | 0   | 0   | 0   | 0   | 42  | 527  | 0   |
| 22             | 256       | 4            | 0   | 0   | 1   | 36  | 120 | 95   | 0   |
| 23             | 1498      | 4            | 7   | 245 | 168 | 282 | 608 | 89   | 9   |
| 24             | 216       | 0            | 0   | 6   | 36  | 66  | 73  | 14   | 20  |

Supplementary Table S7. Sequence distribution in the major clades of GISAID dataset by collection date groups

| Major Clade Id | Sequences | Jan & Before | Feb | Mar  | Apr  | May | Jun | Jul  | Aug |
|----------------|-----------|--------------|-----|------|------|-----|-----|------|-----|
| 1              | 211       | 20           | 1   | 98   | 61   | 16  | 14  | 0    | 0   |
| 2              | 395       | 0            | 0   | 42   | 280  | 64  | 5   | 0    | 0   |
| 3              | 353       | 7            | 0   | 81   | 201  | 34  | 14  | 1    | 1   |
| 4              | 261       | 0            | 2   | 143  | 94   | 14  | 5   | 0    | 0   |
| 5              | 1796      | 26           | 62  | 1060 | 428  | 140 | 76  | 2    | 2   |
| 6              | 1685      | 240          | 242 | 923  | 238  | 32  | 6   | 1    | 0   |
| 7              | 3289      | 213          | 359 | 1662 | 841  | 103 | 52  | 21   | 2   |
| 8              | 221       | 1            | 1   | 178  | 37   | 2   | 0   | 0    | 0   |
| 9              | 218       | 35           | 0   | 96   | 49   | 21  | 11  | 2    | 0   |
| 10             | 425       | 21           | 7   | 186  | 130  | 37  | 12  | 24   | 1   |
| 11             | 236       | 2            | 0   | 49   | 57   | 34  | 44  | 42   | 6   |
| 12             | 1007      | 2            | 1   | 497  | 201  | 87  | 68  | 21   | 20  |
| 13             | 393       | 5            | 0   | 300  | 75   | 3   | 1   | 1    | 0   |
| 14             | 3493      | 50           | 3   | 736  | 1041 | 608 | 370 | 224  | 311 |
| 15             | 3443      | 88           | 11  | 607  | 985  | 496 | 224 | 433  | 317 |
| 16             | 3447      | 104          | 0   | 1    | 6    | 57  | 346 | 2690 | 189 |
| 17             | 560       | 1            | 0   | 148  | 208  | 58  | 47  | 77   | 14  |
| 18             | 781       | 9            | 1   | 205  | 202  | 52  | 47  | 55   | 146 |
| 19             | 1366      | 6            | 1   | 116  | 181  | 293 | 524 | 102  | 116 |
| 20             | 2844      | 20           | 6   | 807  | 857  | 356 | 152 | 158  | 301 |
| 21             | 3084      | 48           | 24  | 862  | 792  | 532 | 364 | 135  | 282 |
| 22             | 959       | 1            | 0   | 209  | 180  | 209 | 246 | 111  | 3   |
| 23             | 408       | 1            | 0   | 212  | 117  | 46  | 19  | 4    | 1   |
| 24             | 292       | 0            | 3   | 190  | 58   | 37  | 3   | 1    | 0   |
| 25             | 462       | 0            | 0   | 173  | 149  | 110 | 27  | 3    | 0   |
| 26             | 3003      | 21           | 2   | 1031 | 986  | 537 | 205 | 99   | 53  |

Supplementary Table S8. Sequence distribution in the major clades of GISAID dataset by host age groups

| Major Clade Id | Sequences | Youth | Young Adult | Adult | Senior |
|----------------|-----------|-------|-------------|-------|--------|
| 1              | 211       | 1     | 15          | 27    | 25     |
| 2              | 395       | 0     | 0           | 2     | 2      |
| 3              | 353       | 1     | 8           | 15    | 27     |
| 4              | 261       | 3     | 15          | 21    | 28     |
| 5              | 1796      | 4     | 106         | 138   | 107    |
| 6              | 1685      | 24    | 151         | 244   | 338    |
| 7              | 3289      | 41    | 436         | 440   | 531    |
| 8              | 221       | 0     | 3           | 8     | 12     |
| 9              | 218       | 0     | 25          | 6     | 11     |
| 10             | 425       | 12    | 49          | 70    | 85     |
| 11             | 236       | 3     | 13          | 18    | 16     |
| 12             | 1007      | 7     | 108         | 136   | 183    |
| 13             | 393       | 16    | 40          | 82    | 61     |
| 14             | 3493      | 50    | 311         | 310   | 317    |
| 15             | 3443      | 64    | 370         | 411   | 383    |
| 16             | 3447      | 8     | 1190        | 880   | 687    |
| 17             | 560       | 7     | 51          | 64    | 74     |
| 18             | 781       | 10    | 53          | 57    | 37     |
| 19             | 1366      | 5     | 39          | 45    | 83     |
| 20             | 2844      | 37    | 215         | 342   | 372    |
| 21             | 3084      | 38    | 311         | 449   | 492    |
| 22             | 959       | 25    | 185         | 192   | 314    |
| 23             | 408       | 3     | 28          | 45    | 59     |
| 24             | 292       | 0     | 6           | 15    | 16     |
| 25             | 462       | 0     | 1           | 2     | 2      |
| 26             | 3003      | 27    | 264         | 323   | 425    |



Supplementary Table S9. Sequence distribution in the major clades of GISAID dataset by host genders

| Major Clade Id | Sequences | Male | Female |
|----------------|-----------|------|--------|
| 1              | 211       | 32   | 38     |
| 2              | 395       | 3    | 5      |
| 3              | 353       | 31   | 22     |
| 4              | 261       | 51   | 31     |
| 5              | 1796      | 222  | 158    |
| 6              | 1685      | 414  | 371    |
| 7              | 3289      | 912  | 636    |
| 8              | 221       | 12   | 15     |
| 9              | 218       | 17   | 28     |
| 10             | 425       | 109  | 114    |
| 11             | 236       | 36   | 25     |
| 12             | 1007      | 269  | 327    |
| 13             | 393       | 112  | 86     |
| 14             | 3493      | 538  | 464    |
| 15             | 3443      | 565  | 672    |
| 16             | 3447      | 1326 | 1272   |
| 17             | 560       | 109  | 90     |
| 18             | 781       | 87   | 80     |
| 19             | 1366      | 73   | 96     |
| 20             | 2844      | 541  | 475    |
| 21             | 3084      | 830  | 523    |
| 22             | 959       | 375  | 369    |
| 23             | 408       | 84   | 60     |
| 24             | 292       | 22   | 16     |
| 25             | 462       | 4    | 3      |
| 26             | 3003      | 535  | 527    |
